# Supplementary material for: Key Gene Network Related to Primary Ciliary Dyskinesia in Hippocampus of Patients with Alzheimer’S Disease Revealed by Weighted Gene Co-Expression Network Analysis
Source: Research Square preprint supplement (doi:10.21203/rs.3.rs-997410/v2), 2021-12-21
Supplement: Supplementary file 1 [file 3cc6a99be42c764e00ad6f51.xlsx]

## Sheet: EnrichAll
ID	description	GeneRatio	BgRatio	pValue	FDR	qvalue	geneID	size	DB	enrichmentRatio
hsa05016	Huntington disease	44337	193/7914	0.000121255	0.00412268	0.00412268	DNAH12/DNAH2/DNAH5/DNAI1/DNAI2	5	pathway_KEGG	0.238095
GO:0035082	axoneme assembly	22/97	52/17913	2.54e-37	3.41e-34	3.29e-34	ARMC4/CCDC114/CCDC39/CFAP100/CFAP157/CFAP206/CFAP43/CFAP44/CFAP73/DNAAF1/DNAAF3/DNAAF4/DNAH5/DNAI1/DNAI2/DRC1/HYDIN/LRGUK/PIH1D3/RSPH1/TTC26/ZMYND10	22	geneontology_Biological_Process	0.226804
GO:0060271	cilium assembly	35/97	335/17913	5.73e-36	3.86e-33	3.72e-33	ARL13B/ARMC4/BBOF1/CCDC114/CCDC39/CCDC65/CETN2/CFAP100/CFAP157/CFAP206/CFAP43/CFAP44/CFAP53/CFAP54/CFAP73/DNAAF1/DNAAF3/DNAAF4/DNAH5/DNAI1/DNAI2/DRC1/DYNLRB2/FOXJ1/HYDIN/IFT81/IQUB/LRGUK/MNS1/PIH1D3/RSPH1/TMEM231/TMEM67/TTC26/ZMYND10	35	geneontology_Biological_Process	0.360825
GO:0044782	cilium organization	35/97	346/17913	1.82e-35	8.15e-33	7.86e-33	ARL13B/ARMC4/BBOF1/CCDC114/CCDC39/CCDC65/CETN2/CFAP100/CFAP157/CFAP206/CFAP43/CFAP44/CFAP53/CFAP54/CFAP73/DNAAF1/DNAAF3/DNAAF4/DNAH5/DNAI1/DNAI2/DRC1/DYNLRB2/FOXJ1/HYDIN/IFT81/IQUB/LRGUK/MNS1/PIH1D3/RSPH1/TMEM231/TMEM67/TTC26/ZMYND10	35	geneontology_Biological_Process	0.360825
GO:0003341	cilium movement	20/97	52/17913	6.39e-33	2.15e-30	2.07e-30	ARMC4/CCDC114/CCDC39/CCDC65/CFAP100/CFAP206/CFAP43/CFAP53/CFAP54/CFAP73/DNAAF1/DNAAF4/DNAH5/DNAI1/DNAI2/HYDIN/MAATS1/PIH1D3/ROPN1L/WDR66	20	geneontology_Biological_Process	0.206186
GO:0001578	microtubule bundle formation	22/97	78/17913	1.2e-32	3.22e-30	3.1e-30	ARMC4/CCDC114/CCDC39/CFAP100/CFAP157/CFAP206/CFAP43/CFAP44/CFAP73/DNAAF1/DNAAF3/DNAAF4/DNAH5/DNAI1/DNAI2/DRC1/HYDIN/LRGUK/PIH1D3/RSPH1/TTC26/ZMYND10	22	geneontology_Biological_Process	0.226804
GO:0070286	axonemal dynein complex assembly	14/97	25/17913	2.97e-26	6.07e-24	5.84e-24	ARMC4/CCDC114/CCDC39/CFAP100/CFAP73/DNAAF1/DNAAF3/DNAAF4/DNAH5/DNAI1/DNAI2/DRC1/PIH1D3/ZMYND10	14	geneontology_Biological_Process	0.14433
GO:0007018	microtubule-based movement	25/97	224/17913	3.15e-26	6.07e-24	5.84e-24	ARMC4/CCDC114/CCDC39/CCDC65/CFAP100/CFAP206/CFAP43/CFAP53/CFAP54/CFAP73/DNAAF1/DNAAF4/DNAH12/DNAH5/DNAI1/DNAI2/DYNLRB2/HYDIN/IFT81/KIF4A/MAATS1/PIH1D3/ROPN1L/TTC26/WDR66	25	geneontology_Biological_Process	0.257732
GO:0000226	microtubule cytoskeleton organization	27/97	460/17913	7.56e-21	1.27e-18	1.23e-18	ARMC4/CCDC114/CCDC39/CCDC78/CETN2/CFAP100/CFAP157/CFAP206/CFAP43/CFAP44/CFAP73/DNAAF1/DNAAF3/DNAAF4/DNAH5/DNAI1/DNAI2/DRC1/HYDIN/KIF4A/LRGUK/PIH1D3/RSPH1/TMEM67/TTC26/WEE1/ZMYND10	27	geneontology_Biological_Process	0.278351
GO:0036158	outer dynein arm assembly	8/97	13/17913	6.93e-16	1.04e-13	9.99e-14	ARMC4/CCDC114/DNAAF1/DNAAF4/DNAH5/DNAI1/DNAI2/ZMYND10	8	geneontology_Biological_Process	0.0824742
GO:0030317	flagellated sperm motility	11/97	77/17913	3.26e-13	3.99e-11	3.85e-11	CATSPERD/CCDC39/CFAP157/CFAP43/CFAP44/CFAP69/DNAH5/DNAI1/PIH1D3/ROPN1L/WDR66	11	geneontology_Biological_Process	0.113402
GO:0097722	sperm motility	11/97	77/17913	3.26e-13	3.99e-11	3.85e-11	CATSPERD/CCDC39/CFAP157/CFAP43/CFAP44/CFAP69/DNAH5/DNAI1/PIH1D3/ROPN1L/WDR66	11	geneontology_Biological_Process	0.113402
GO:0007368	determination of left/right symmetry	11/97	114/17913	2.67e-11	2.99e-09	2.88e-09	ARL13B/ARMC4/CCDC39/CFAP53/DNAAF1/DNAAF4/DNAH5/DNAI1/DNAI2/DRC1/FOXJ1	11	geneontology_Biological_Process	0.113402
GO:0036159	inner dynein arm assembly	6/97	13/17913	3.59e-11	3.71e-09	3.58e-09	CCDC39/CFAP100/CFAP73/DNAAF1/DNAAF4/ZMYND10	6	geneontology_Biological_Process	0.0618557
GO:0009855	determination of bilateral symmetry	11/97	123/17913	6.14e-11	5.9e-09	5.69e-09	ARL13B/ARMC4/CCDC39/CFAP53/DNAAF1/DNAAF4/DNAH5/DNAI1/DNAI2/DRC1/FOXJ1	11	geneontology_Biological_Process	0.113402
GO:0009799	specification of symmetry	11/97	124/17913	6.71e-11	6.02e-09	5.8e-09	ARL13B/ARMC4/CCDC39/CFAP53/DNAAF1/DNAAF4/DNAH5/DNAI1/DNAI2/DRC1/FOXJ1	11	geneontology_Biological_Process	0.113402
GO:0044458	motile cilium assembly	6/97	21/17913	1.1e-09	9.22e-08	8.88e-08	BBOF1/CCDC39/DNAAF1/DNAAF3/FOXJ1/ZMYND10	6	geneontology_Biological_Process	0.0618557
GO:0001539	cilium or flagellum-dependent cell motility	5/97	22/17913	1.03e-07	7.68e-06	7.4e-06	CCDC39/CFAP43/CFAP54/DNAH2/DRC1	5	geneontology_Biological_Process	0.0515464
GO:0060285	cilium-dependent cell motility	5/97	22/17913	1.03e-07	7.68e-06	7.4e-06	CCDC39/CFAP43/CFAP54/DNAH2/DRC1	5	geneontology_Biological_Process	0.0515464
GO:0007389	pattern specification process	13/97	408/17913	3.02e-07	2.14e-05	2.06e-05	ARL13B/ARMC4/CCDC39/CFAP53/DNAAF1/DNAAF4/DNAH5/DNAI1/DNAI2/DRC1/FOXJ1/MNS1/SIX3	13	geneontology_Biological_Process	0.134021
GO:0003352	regulation of cilium movement	4/97	13/17913	5.56e-07	3.74e-05	3.61e-05	ARMC4/CCDC39/CCDC65/DNAAF1	4	geneontology_Biological_Process	0.0412371
GO:0060972	left/right pattern formation	4/97	20/17913	3.66e-06	0.00023474	0.000226167	ARL13B/DNAAF1/FOXJ1/MNS1	4	geneontology_Biological_Process	0.0412371
GO:0003351	epithelial cilium movement	4/97	21/17913	4.51e-06	0.000275645	0.000265578	CCDC39/CFAP53/DNAAF1/ROPN1L	4	geneontology_Biological_Process	0.0412371
GO:0007286	spermatid development	7/97	132/17913	7.45e-06	0.000435768	0.000419853	CATSPERD/CFAP157/CFAP43/CFAP44/ROPN1L/RSPH1/TTC26	7	geneontology_Biological_Process	0.0721649
GO:0048515	spermatid differentiation	7/97	138/17913	9.97e-06	0.000559195	0.000538773	CATSPERD/CFAP157/CFAP43/CFAP44/ROPN1L/RSPH1/TTC26	7	geneontology_Biological_Process	0.0721649
GO:0060632	regulation of microtubule-based movement	4/97	26/17913	1.1e-05	0.00059346	0.000571786	ARMC4/CCDC39/CCDC65/DNAAF1	4	geneontology_Biological_Process	0.0412371
GO:0003356	regulation of cilium beat frequency	3/97	10/17913	1.8e-05	0.000895807	0.000863091	ARMC4/CCDC39/DNAAF1	3	geneontology_Biological_Process	0.0309278
GO:0060287	epithelial cilium movement involved in determination of left/right asymmetry	3/97	10/17913	1.8e-05	0.000895807	0.000863091	CCDC39/CFAP53/DNAAF1	3	geneontology_Biological_Process	0.0309278
GO:0007288	sperm axoneme assembly	3/97	12/17913	3.27e-05	0.00157124	0.00151385	CFAP157/CFAP43/CFAP44	3	geneontology_Biological_Process	0.0309278
GO:0007281	germ cell development	7/97	238/17913	0.000311607	0.0144629	0.0139347	CATSPERD/CFAP157/CFAP43/CFAP44/ROPN1L/RSPH1/TTC26	7	geneontology_Biological_Process	0.0721649
GO:0060541	respiratory system development	6/97	193/17913	0.000634636	0.028474	0.0274341	CCDC39/DNAAF1/FOXJ1/HYDIN/LOX/PGR	6	geneontology_Biological_Process	0.0618557
GO:0007224	smoothened signaling pathway	5/97	131/17913	0.00072917	0.0316601	0.0305038	ARL13B/IFT81/IQUB/TMEM231/TTC26	5	geneontology_Biological_Process	0.0515464
GO:0044441	ciliary part	35/111	415/18678	6.36e-31	9.47e-29	7.96e-29	AGBL2/ARL13B/ARMC4/BBOF1/CATSPERD/CCDC114/CCDC39/CCDC65/CETN2/CFAP100/CFAP157/CFAP206/CFAP43/CFAP54/CFAP69/CFAP73/DNAAF1/DNAH2/DNAH5/DNAI1/DNAI2/DRC1/DRC3/DYNLRB2/FANK1/HYDIN/IFT81/MAATS1/MLF1/MNS1/RSPH1/TMEM231/TMEM67/TTC26/WDR66	35	geneontology_Cellular_Component	0.315315
GO:0005930	axoneme	21/111	100/18678	3.41e-27	2.13e-25	1.79e-25	ARL13B/ARMC4/CCDC114/CCDC39/CCDC65/CFAP100/CFAP206/CFAP43/CFAP54/CFAP73/DNAAF1/DNAH2/DNAH5/DNAI1/DNAI2/DRC1/DRC3/HYDIN/MAATS1/MNS1/WDR66	21	geneontology_Cellular_Component	0.189189
GO:0097014	ciliary plasm	21/111	101/18678	4.28e-27	2.13e-25	1.79e-25	ARL13B/ARMC4/CCDC114/CCDC39/CCDC65/CFAP100/CFAP206/CFAP43/CFAP54/CFAP73/DNAAF1/DNAH2/DNAH5/DNAI1/DNAI2/DRC1/DRC3/HYDIN/MAATS1/MNS1/WDR66	21	geneontology_Cellular_Component	0.189189
GO:0031514	motile cilium	23/111	162/18678	1.46e-25	5.42e-24	4.56e-24	ANXA1/CATSPERD/CCDC65/CFAP100/CFAP206/CFAP300/CFAP43/CFAP44/CFAP52/CFAP69/CFAP73/DNAH5/DNAI2/DRC1/DRC3/IFT81/IQUB/MAATS1/MNS1/ROPN1L/RSPH1/SPAG17/WDR66	23	geneontology_Cellular_Component	0.207207
GO:0032838	plasma membrane bounded cell projection cytoplasm	22/111	181/18678	6.14e-23	1.83e-21	1.54e-21	ARL13B/ARMC4/CCDC114/CCDC39/CCDC65/CFAP100/CFAP206/CFAP43/CFAP54/CFAP73/DNAAF1/DNAH2/DNAH5/DNAI1/DNAI2/DRC1/DRC3/HYDIN/KIF4A/MAATS1/MNS1/WDR66	22	geneontology_Cellular_Component	0.198198
GO:0044447	axoneme part	13/111	31/18678	1.05e-21	2.62e-20	2.2e-20	CCDC114/CCDC65/CFAP100/CFAP206/CFAP73/DNAH2/DNAH5/DNAI1/DNAI2/DRC1/HYDIN/MAATS1/WDR66	13	geneontology_Cellular_Component	0.117117
GO:0099568	cytoplasmic region	22/111	402/18678	1.96e-15	4.17e-14	3.5e-14	ARL13B/ARMC4/CCDC114/CCDC39/CCDC65/CFAP100/CFAP206/CFAP43/CFAP54/CFAP73/DNAAF1/DNAH2/DNAH5/DNAI1/DNAI2/DRC1/DRC3/HYDIN/KIF4A/MAATS1/MNS1/WDR66	22	geneontology_Cellular_Component	0.198198
GO:0030286	dynein complex	9/111	39/18678	1.21e-12	2.21e-11	1.86e-11	CCDC114/CCDC65/DNAH12/DNAH2/DNAH5/DNAI1/DNAI2/DRC1/DYNLRB2	9	geneontology_Cellular_Component	0.0810811
GO:0005858	axonemal dynein complex	7/111	15/18678	1.34e-12	2.21e-11	1.86e-11	CCDC114/CCDC65/DNAH2/DNAH5/DNAI1/DNAI2/DRC1	7	geneontology_Cellular_Component	0.0630631
GO:0005875	microtubule associated complex	9/111	92/18678	3.83e-09	5.71e-08	4.8e-08	CCDC114/CCDC65/DNAH12/DNAH2/DNAH5/DNAI1/DNAI2/DRC1/DYNLRB2	9	geneontology_Cellular_Component	0.0810811
GO:0097729	9+2 motile cilium	8/111	89/18678	5.71e-08	7.73e-07	6.5e-07	CATSPERD/CFAP69/DNAH5/DNAI2/IFT81/MNS1/RSPH1/WDR66	8	geneontology_Cellular_Component	0.0720721
GO:0097223	sperm part	10/111	179/18678	1.14e-07	1.41e-06	1.19e-06	CATSPERD/CFAP69/DNAI2/IFT81/IQUB/LRGUK/MNS1/RSPH1/SPAG8/WDR66	10	geneontology_Cellular_Component	0.0900901
GO:0036126	sperm flagellum	7/111	84/18678	6.72e-07	7.7e-06	6.48e-06	CATSPERD/CFAP69/DNAI2/IFT81/MNS1/RSPH1/WDR66	7	geneontology_Cellular_Component	0.0630631
GO:0036064	ciliary basal body	7/111	111/18678	4.42e-06	4.7e-05	3.95e-05	AGBL2/BBOF1/CETN2/CFAP157/FANK1/IFT81/MLF1	7	geneontology_Cellular_Component	0.0630631
GO:0005874	microtubule	11/111	357/18678	9.17e-06	9.11e-05	7.66e-05	CFAP206/CSPP1/DNAH12/DNAH2/DNAH5/DNAI1/DNAI2/DYNLRB2/KIF4A/SPAG17/TEKT1	11	geneontology_Cellular_Component	0.0990991
GO:0097542	ciliary tip	3/111	45/18678	0.00241728	0.0225109	0.0189248	DYNLRB2/IFT81/TTC26	3	geneontology_Cellular_Component	0.027027
GO:0036038	MKS complex	2/111	13/18678	0.00261572	0.022926	0.0192737	TMEM231/TMEM67	2	geneontology_Cellular_Component	0.018018
GO:0044450	microtubule organizing center part	5/111	170/18678	0.00347369	0.0287545	0.0241737	AGBL2/CCDC146/CCDC78/CETN2/ZMYND10	5	geneontology_Cellular_Component	0.045045
GO:0030992	intraciliary transport particle B	2/111	16/18678	0.00397764	0.0311931	0.0262238	IFT81/TTC26	2	geneontology_Cellular_Component	0.018018
GO:0035869	ciliary transition zone	3/111	61/18678	0.00572408	0.0426444	0.0358508	CETN2/TMEM231/TMEM67	3	geneontology_Cellular_Component	0.027027
GO:0005814	centriole	4/111	124/18678	0.00641857	0.0455413	0.0382862	AGBL2/CCDC146/CCDC78/CETN2	4	geneontology_Cellular_Component	0.036036
GO:0097228	sperm principal piece	2/111	21/18678	0.00682746	0.0462405	0.0388741	CATSPERD/IFT81	2	geneontology_Cellular_Component	0.018018
GO:0097225	sperm midpiece	2/111	22/18678	0.00748124	0.0484654	0.0407445	CFAP69/IFT81	2	geneontology_Cellular_Component	0.018018
GO:0003777	microtubule motor activity	4/98	43/16969	0.000108599	0.015793	0.015793	DNAH12/DNAH2/DNAI2/DYNLRB2	4	geneontology_Molecular_Function	0.0408163
GO:0070840	dynein complex binding	3/98	22/16969	0.000265611	0.015793	0.015793	CFAP100/CFAP73/DNAAF1	3	geneontology_Molecular_Function	0.0306122
GO:0003774	motor activity	5/98	103/16969	0.000324514	0.015793	0.015793	DNAH12/DNAH2/DNAI1/DNAI2/DYNLRB2	5	geneontology_Molecular_Function	0.0510204
